# Supplementary material for: Ultra-trace Hg determination in crude oils by CV-ICP-MS: overcoming the limitations of sample preparation to determine sub-ppb levels
Source: Royal Society of Chemistry journal article supplement (doi:10.1039/d2ja00169a), 2022-01-01
Supplement: d2ja00169a1.pdf [file d2ja00169a1.pdf]

**Ultra trace Hg determination in crude oils by CV-ICP-MS:  
overcoming the limitations of sample preparation to determine  
sub-ppb levels**

Gabriel T. Druzian<sup>a</sup>, Mariele S. Nascimento<sup>a</sup>, Rochele S. Picoloto<sup>a</sup>, Marcia F. Mesko<sup>b</sup>,  
Erico M. M. Flores<sup>a</sup> and Paola A. Mello<sup>a\*</sup>

*<sup>a</sup>Departamento de Química, Universidade Federal de Santa Maria, 97105-900, Santa Maria, RS, Brazil.*

*<sup>b</sup>Centro de Ciências Químicas, Farmacêuticas e de Alimentos, Universidade Federal de Pelotas, 96160-000, Capão do Leão, RS, Brazil.*

Corresponding author. Tel: +55 55 3220-9445

E-mail address: [paola.mello@ufsm.br](mailto:paola.mello@ufsm.br)

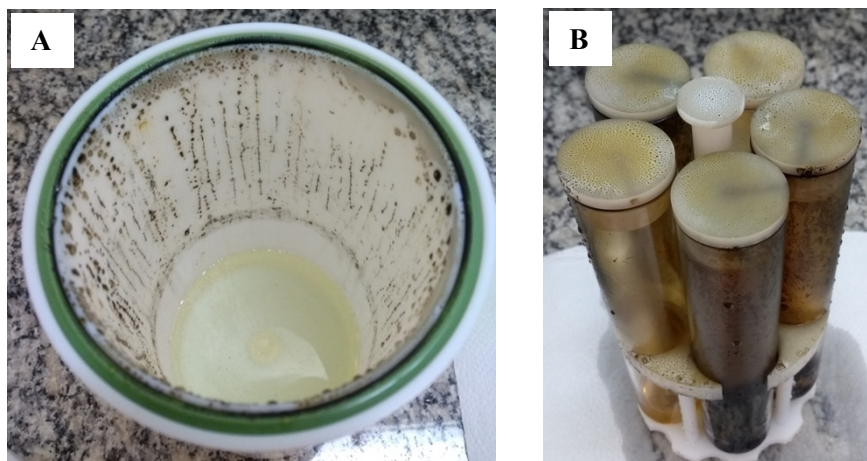

**Figure S1.** Aspects of the (A) PTFE vessel (cavity) and (B) digestion vessels, after crude oil digestion by MAWD-PDC using the recommended microwave irradiation program. Conditions: 0.5 g of Crude oil 1, 6 mL of 14.4 mol L<sup>-1</sup> HNO<sub>3</sub> 270 °C and 20 min at 270 °C.

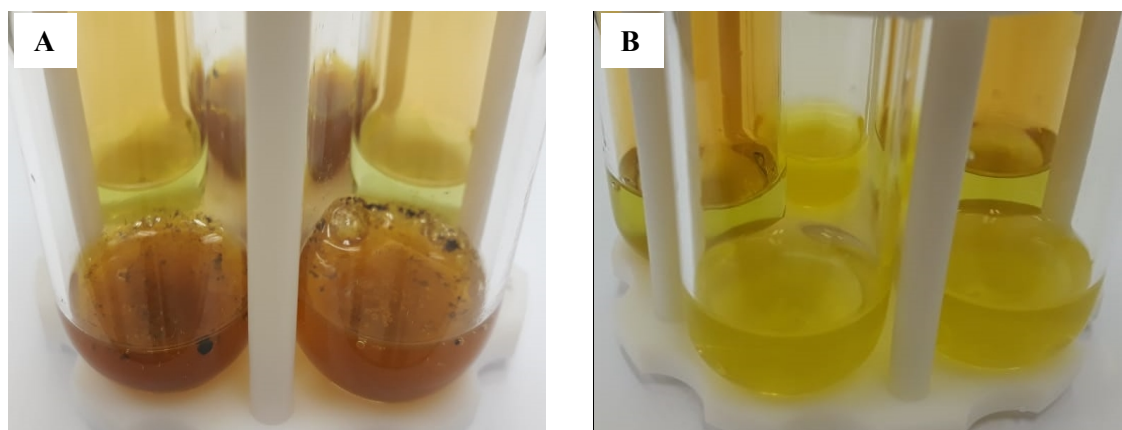

**Figure S2.** Aspects of the digests of Crude oil 1 after digestion by MAWD-PDC using 1.2 g with (A) 6 mL and (B) 8 mL of HNO<sub>3</sub>. Conditions: *i*) 5 min of ramp to 90 °C; *ii*) 10 min up to 110 °C; *iii*) 10 min up to 120 °C; *iv*) 10 min up to 130 °C; *v*) 15 min up to 140 °C; *vi*) 15 min up to 270 °C (hold for 20 min).

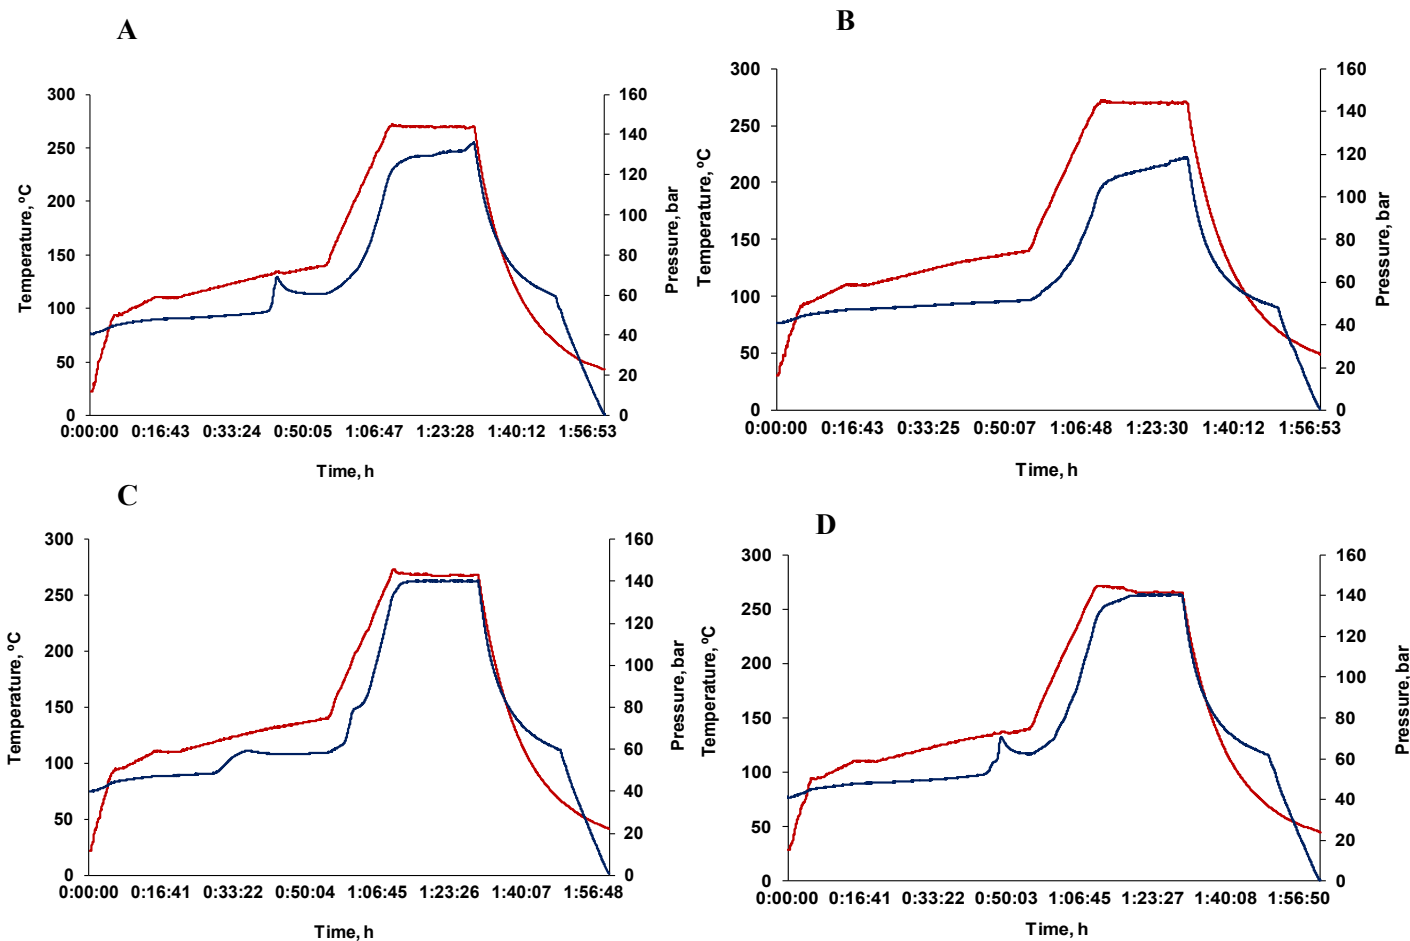

**Figure S3.** Irradiation program profiles for (A) Crude oil 1 (medium), (B) Crude oil 3 (heavy), (C) Crude oil 4 (heavy) and (D) Crude oil 6 (light). The red line corresponds to temperature profile and the blue line corresponds to pressure profile. Conditions: 1.2 g of crude oil, 8 mL of HNO<sub>3</sub>, and *i*) 5 min of ramp to 90 °C; *ii*) 10 min up to 110 °C; *iii*) 10 min up to 120 °C; *iv*) 10 min up to 130 °C; *v*) 15 min up to 140 °C; *vi*) 15 min up to 220, 250 or 270 °C (hold for 20 min) 270 °C.

**Table S1.** Other reported methods for sample preparation of crude oil for Hg determination and respective LODs.

| Sample preparation                        | General conditions                                                                                                                                                                                                                                                                                                                                                                                                    | Analytical technique                     | LOD                                                      |
|-------------------------------------------|-----------------------------------------------------------------------------------------------------------------------------------------------------------------------------------------------------------------------------------------------------------------------------------------------------------------------------------------------------------------------------------------------------------------------|------------------------------------------|----------------------------------------------------------|
| Thermal decomposition <sup>1</sup>        | 0.3 g of alumina and about 25 mg of sample. Air flow rate of 0.7 L min <sup>-1</sup> was used to release Hg formed in the reduction reaction. Air flow rate of 0.8-1.2 L min <sup>-1</sup> and temperatures of 350-450 °C 600-770 °C and 680-730 °C were used for the sample decomposition in the first (evaporator) and second (after burner) chambers and analytical cell of the PYRO-915+ pyrolyzer, respectively. |                                          | 11.0 ng g <sup>-1</sup> *                                |
| Combustion <sup>5</sup>                   | 0.1 g of sample. The temperature of the chamber for atomization is around 700-750°C.                                                                                                                                                                                                                                                                                                                                  | CV-AAS with Zeeman background correction | n.i                                                      |
| Combustion-gold amalgamation <sup>6</sup> | 0.1 g of sample. Amalgamator temperature at 600 °C. Catalytic section of furnace at 850 °C.                                                                                                                                                                                                                                                                                                                           | CV-AAS                                   | n.i                                                      |
| Direct analysis <sup>13</sup>             | 30 µL of emulsions of sample. Pyrolysis temperature at 400 °C. Atomization temperature at 1400 °C.                                                                                                                                                                                                                                                                                                                    | ETAAS                                    | 0.78 µg L <sup>-1</sup> *                                |
| Direct analysis <sup>16</sup>             | 2 mL of emulsion of sample (50% v/v), propan-1-ol (48% v/v) and water (2% v/v).                                                                                                                                                                                                                                                                                                                                       | PVG-AAS                                  | 0.6 µg L <sup>-1</sup>                                   |
| Extraction <sup>14</sup>                  | 5 g of sample and 10 µL of a mixture of BrCl/HCl (oxidizing solution). Agitation for 30 min. Centrifugation for 15 min.                                                                                                                                                                                                                                                                                               | CV-AFS                                   | 0.38 µg kg <sup>-1</sup>                                 |
| Extraction <sup>15</sup>                  | 20 mL of sample and 4 mL of extraction solution (2.5% m/v triton X-100 and 15% v/v HNO <sub>3</sub> ). Agitation for 30 min at 80 °C.                                                                                                                                                                                                                                                                                 | CV-AAS                                   | 1.9 µg L <sup>-1</sup>                                   |
| <b>MAWD-PDC – the proposed method</b>     | <b>1.2 g of sample, 8 mL of concentrated HNO<sub>3</sub>, and 85 min of the heating program (plus 20 min for cooling).</b>                                                                                                                                                                                                                                                                                            | <b>CV-ICP-MS</b>                         | <b>0.16 ng g<sup>-1</sup> or (7.2 ng L<sup>-1</sup>)</b> |

\*Limit of quantification

n.i: Not informed

CV-AAS: cold vapor atomic absorption spectrometry;

CV-AFS: cold vapor atomic fluorescence spectrometry;  
ETAAS: electrothermal atomic absorption spectrometry;  
ID-CV-ICP-MS: isotope dilution cold-vapor inductively coupled plasma mass spectrometry;  
PVG-AAS: photochemical vapor generation atomic absorption spectrometry.
